# Supplementary material for: Regulating the Golgi apparatus by co-delivery of a COX-2 inhibitor and Brefeldin A for suppression of tumor metastasis
Source: Royal Society of Chemistry journal article supplement (doi:10.1039/c8bm00381e), 2018-01-01
Supplement: c8bm00381e1.pdf [file c8bm00381e1.pdf]

Supporting information for

**Regulating Golgi Apparatus by co-delivery of COX-2 Inhibitor  
and Brefeldin A for Suppression of Tumor Metastasis**

Ru-Yi Yu<sup>a,1</sup>, Lei Xing<sup>a,b,c,d,1</sup>, Peng-Fei Cui<sup>a</sup>, Jian-Bin Qiao<sup>a</sup>, Yu-Jing He<sup>a</sup>, Xin  
Chang<sup>a</sup>, Tian-Jiao Zhou<sup>a</sup>, Qing-Ri Jin<sup>e,\*</sup>, Hu-Lin Jiang<sup>a,b,c,d,\*</sup>, Yanyu Xiao<sup>a,\*</sup>

<sup>a</sup> State Key Laboratory of Natural Medicines, Department of Pharmaceutics, China  
Pharmaceutical University, Nanjing 210009, China

<sup>b</sup> Jiangsu Key Laboratory of Druggability of Biopharmaceuticals, China  
Pharmaceutical University, Nanjing, 210009, China

<sup>c</sup> Jiangsu Key Laboratory of Drug Screening, China Pharmaceutical University,  
Nanjing, China

<sup>d</sup> Jiangsu Key Laboratory of Drug Discovery for Metabolic Diseases, China  
Pharmaceutical University, Nanjing 210009, China

<sup>e</sup> College of Animal Science and Technology, Zhejiang A&F University, Lin'an,  
Zhejiang 311300, China

\* To whom correspondence should be addressed.

Yanyu Xiao, State Key Laboratory of Natural Medicines, Department of  
Pharmaceutics, China Pharmaceutical University, Nanjing 210009, China

Tel: 025-83271079; E-mail: cpuyanyuxiao@163.com

Hu-Lin Jiang, State Key Laboratory of Natural Medicines, Department of  
Pharmaceutics, China Pharmaceutical University, Nanjing 210009, P. R. China

Tel: +86-025-83271027; Fax: +86-025-83271027; E-mail: [jianghulin3@163.com](mailto:jianghulin3@163.com)

Qing-Ri Jin, College of Animal Science and Technology, Zhejiang A&F  
University, Lin'an, Zhejiang 311300, China

Tel: 0571-63741575; Fax: 0571-63741392; E-mail: [qingrijin@163.com](mailto:qingrijin@163.com)

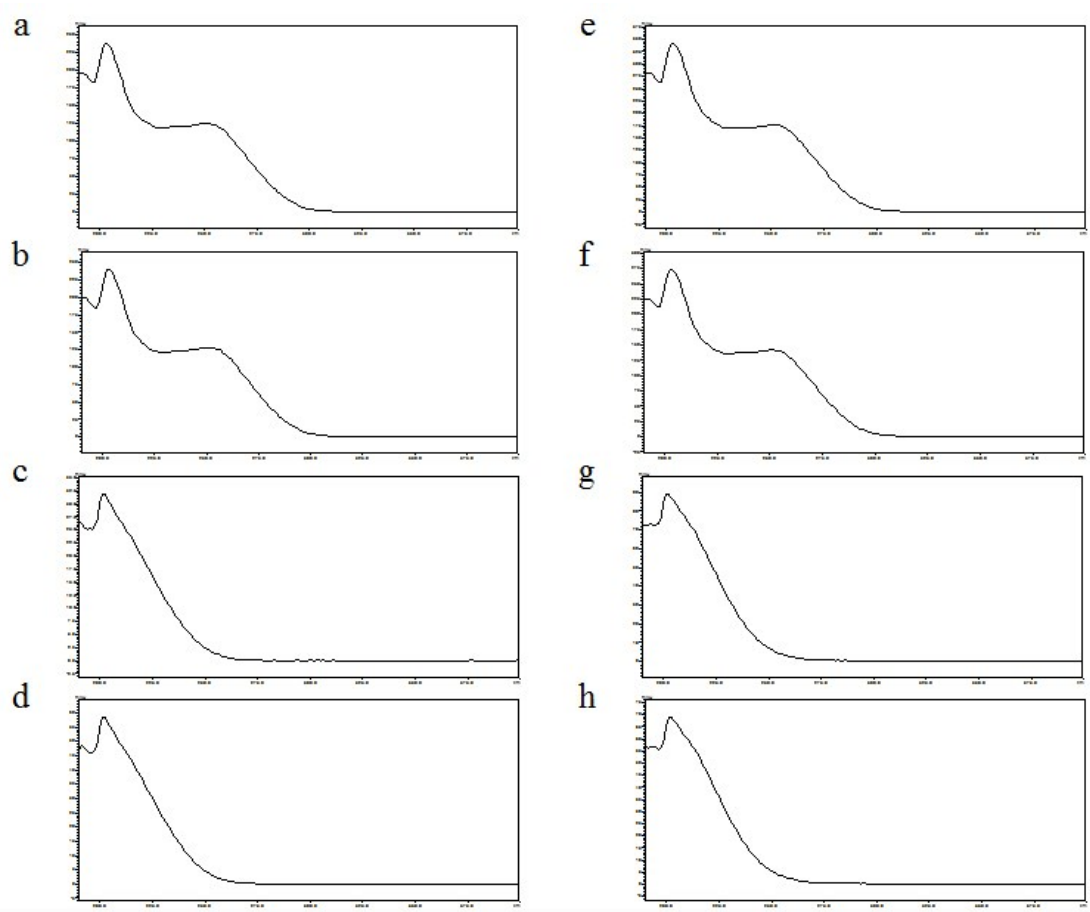

**Figure S1.** UV spectra of dual drugs by HPLC. UV spectra of free CLX and BFA at half-peak height (a, c) before and (b, d) after the retention time, respectively. UV spectra of CLX and BFA in CNPs at half-peak height (e, g) before and (f, h) after the retention time, respectively.

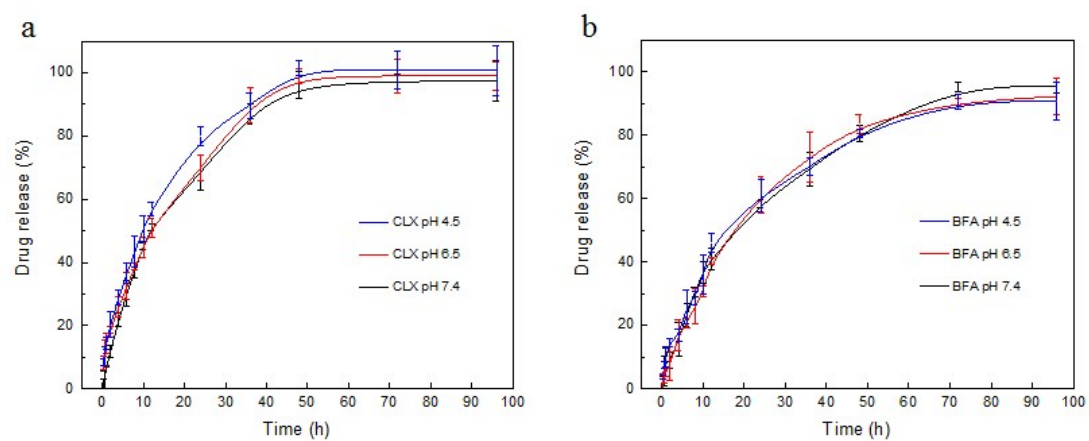

**Figure S2.** Drug release profiles of dual drugs in PBS with different pH values.
